# Supplementary material for: An Experimental Design Approach to Quantitative Expression for Quality Control of a Multicomponent Antidiabetic Formulation by the HILIC Method
Source: MDPI journal article supplement (doi:10.3390/molecules27103135), 2022-05-13
Supplement: s1 [file s1]

## An Experimental Design Approach to Quantitative Expression for Quality Control of a Multicomponent Antidiabetic Formulation by the HILIC Method

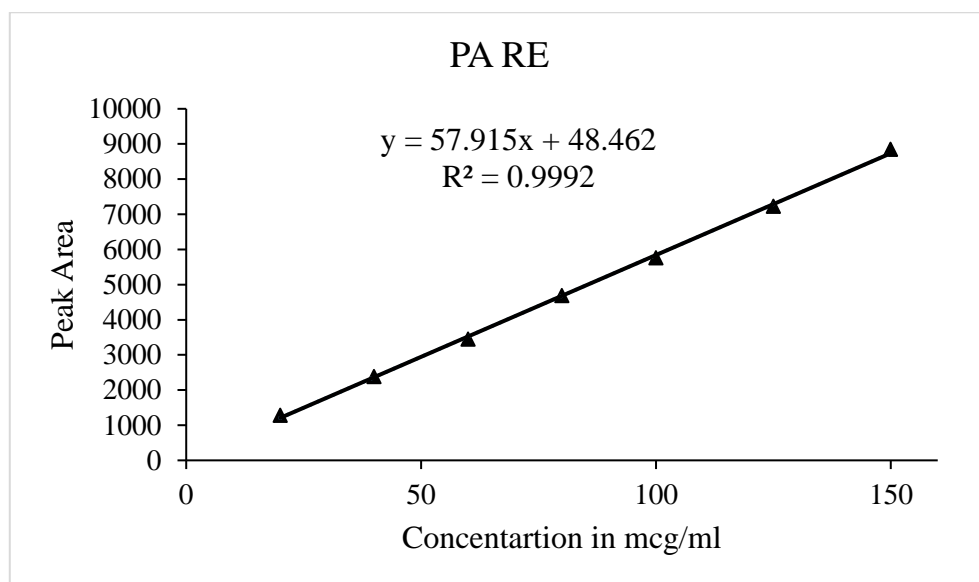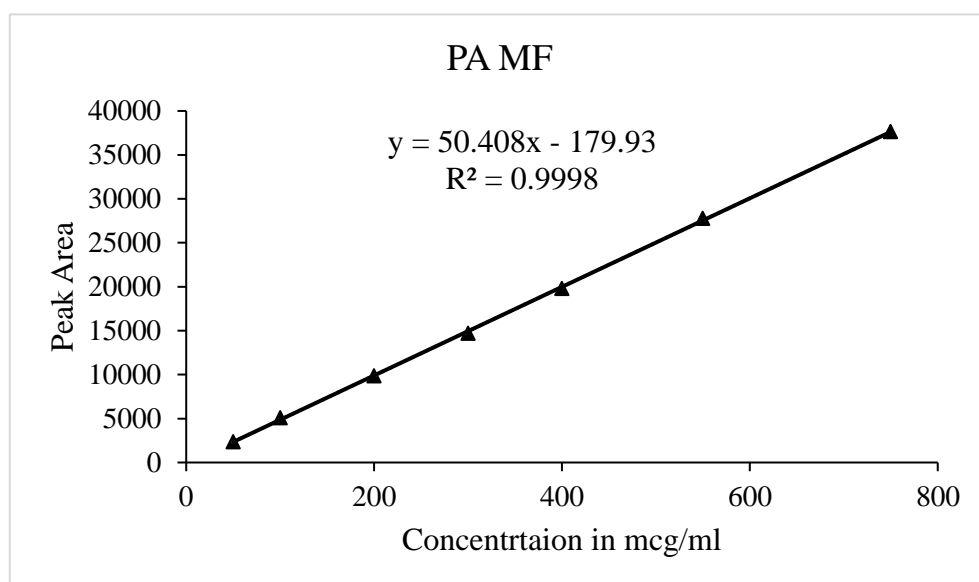

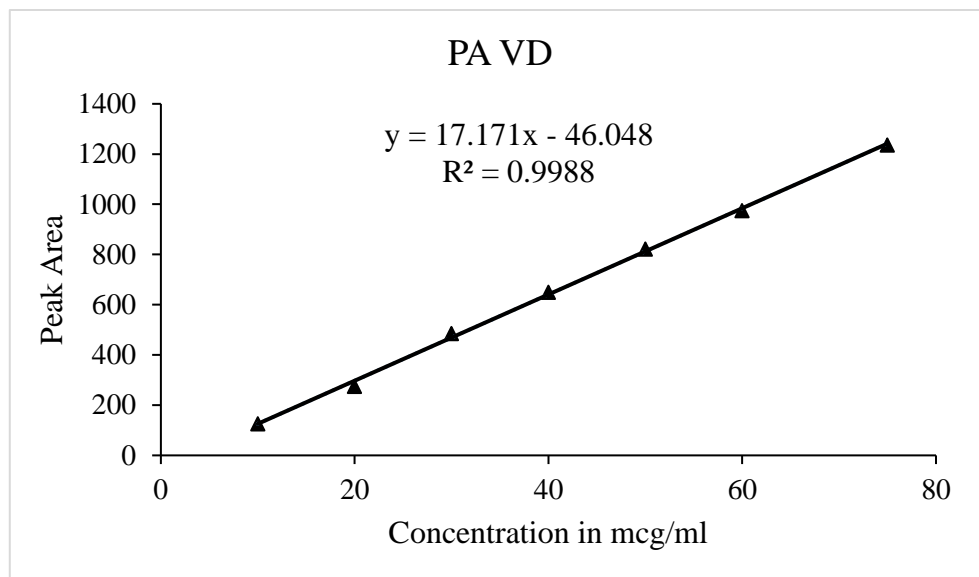

**Figure S1.** Calibration curves for remogliflozin (RE), vildagliptin (VD and metformin (MF).

**Table S1.** Two-level full factorial design for robustness study and results.

|     | Factor 1                  | Factor 2           | Factor 3     | Factor 4       | Response 1                 | Response 2                | Response 3             |
|-----|---------------------------|--------------------|--------------|----------------|----------------------------|---------------------------|------------------------|
| Run | A: Amount of acetonitrile | B: Mobile phase pH | C: Flow Rate | D: Wave Length | Peak Area of Remogliflozin | Peak Area of Vildagliptin | Peak Area of Metformin |
| 1   | 67                        | 5.8                | 1.5          | 212            | 5785                       | 834                       | 12439                  |
| 2   | 67                        | 6.2                | 1.3          | 208            | 5770                       | 833                       | 12900                  |
| 3   | 63                        | 5.8                | 1.5          | 208            | 5760                       | 819                       | 12790                  |
| 4   | 63                        | 6.2                | 1.5          | 208            | 5780                       | 820                       | 12537                  |
| 5   | 67                        | 6.2                | 1.5          | 208            | 5786                       | 827                       | 12509                  |
| 6   | 67                        | 5.8                | 1.5          | 208            | 5761                       | 815                       | 12645                  |
| 7   | 67                        | 5.8                | 1.3          | 212            | 5755                       | 816                       | 12666                  |
| 8   | 63                        | 5.8                | 1.3          | 208            | 5785                       | 818                       | 12555                  |
| 9   | 67                        | 6.2                | 1.3          | 212            | 5764                       | 824                       | 12309                  |
| 10  | 63                        | 5.8                | 1.3          | 212            | 5789                       | 813                       | 12679                  |
| 11  | 63                        | 5.8                | 1.5          | 212            | 5746                       | 822                       | 12780                  |
| 12  | 67                        | 6.2                | 1.5          | 212            | 5765                       | 800                       | 12546                  |
| 13  | 63                        | 6.2                | 1.3          | 212            | 5757                       | 834                       | 12500                  |
| 14  | 63                        | 6.2                | 1.3          | 208            | 5744                       | 839                       | 11900                  |
| 15  | 67                        | 5.8                | 1.3          | 208            | 5759                       | 830                       | 12102                  |
| 16  | 63                        | 6.2                | 1.5          | 212            | 5775                       | 823                       | 12435                  |
